# Supplementary material
Source: PubMed Central journal article supplement (PMC5720688)

Figure S1. Sundaramoorthy et al. 2017

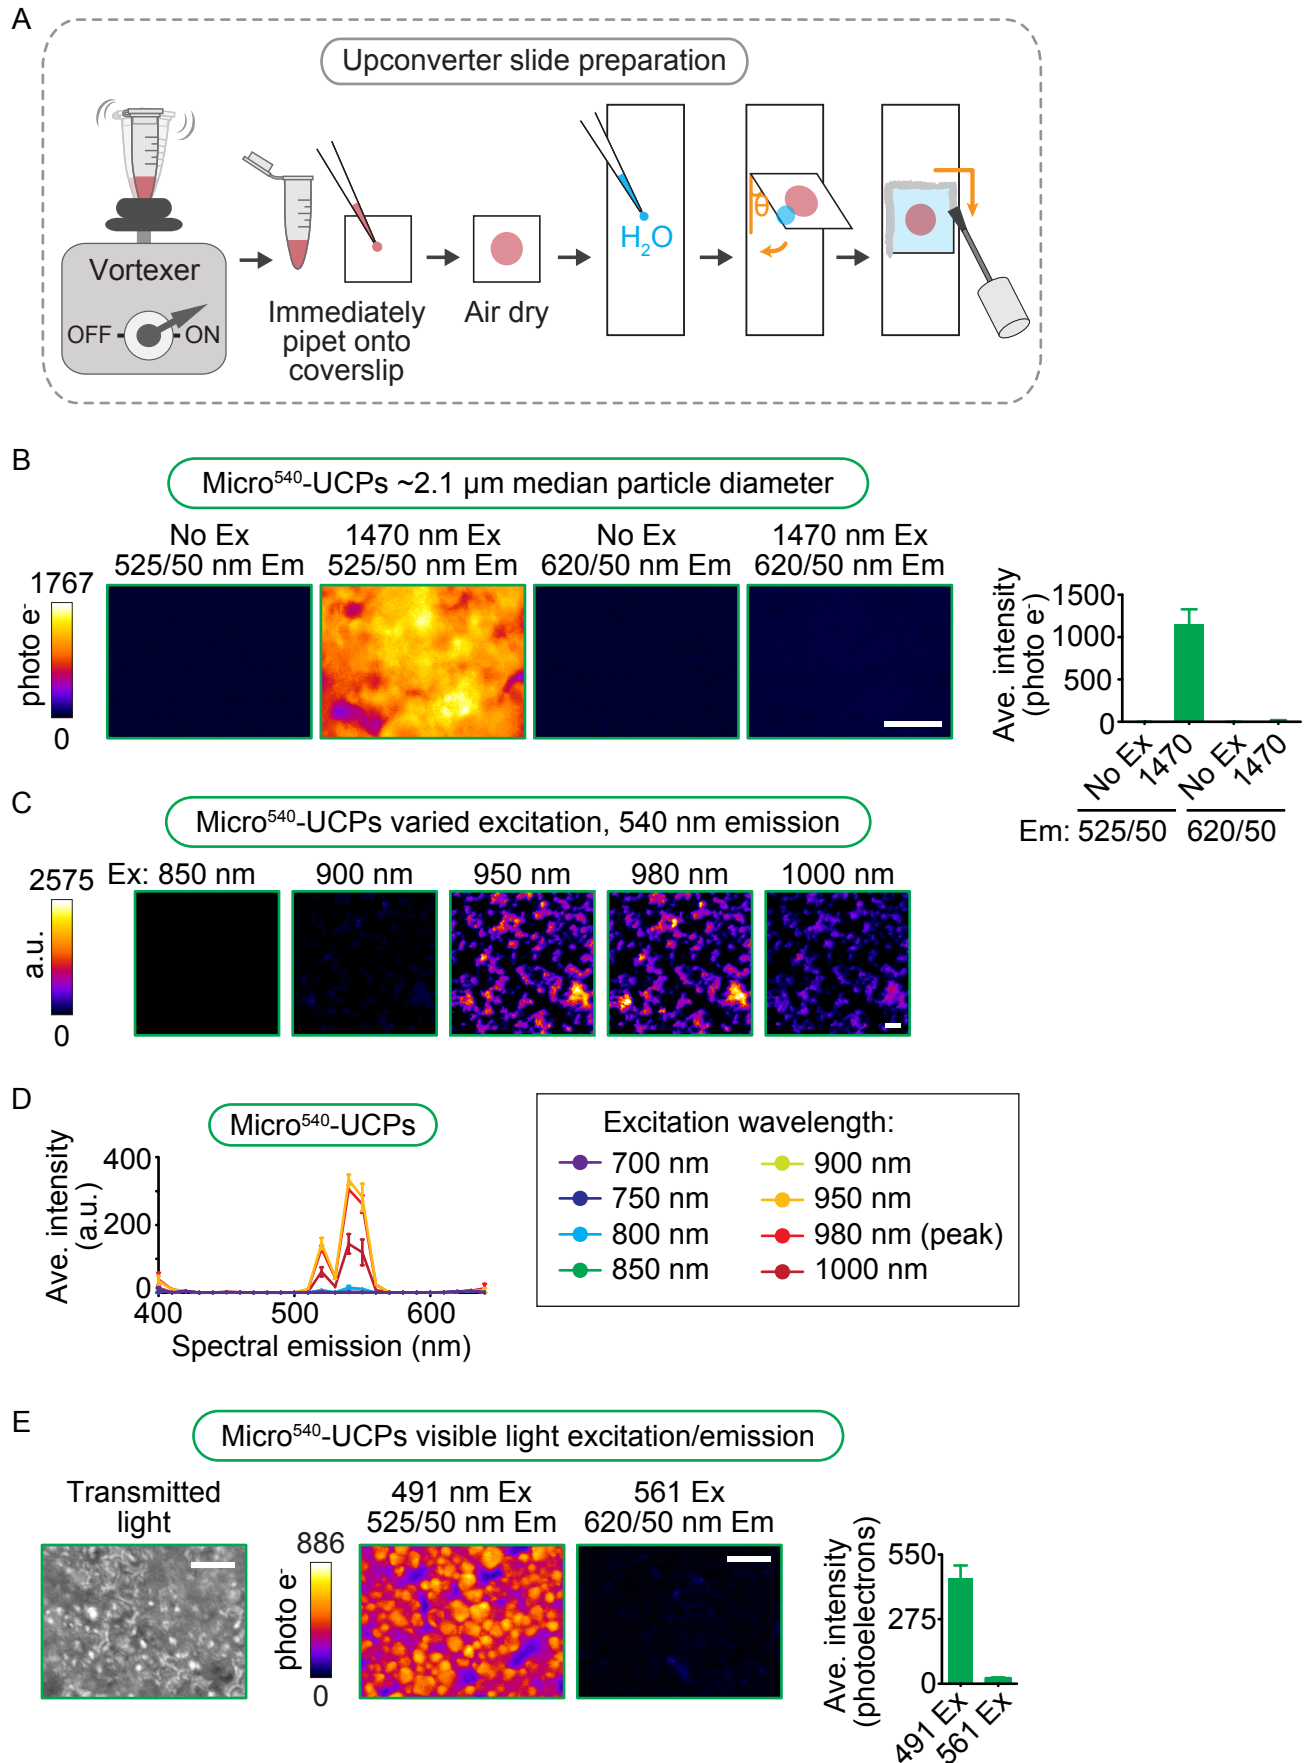

Figure S2. Sundaramoorthy et al. 2017

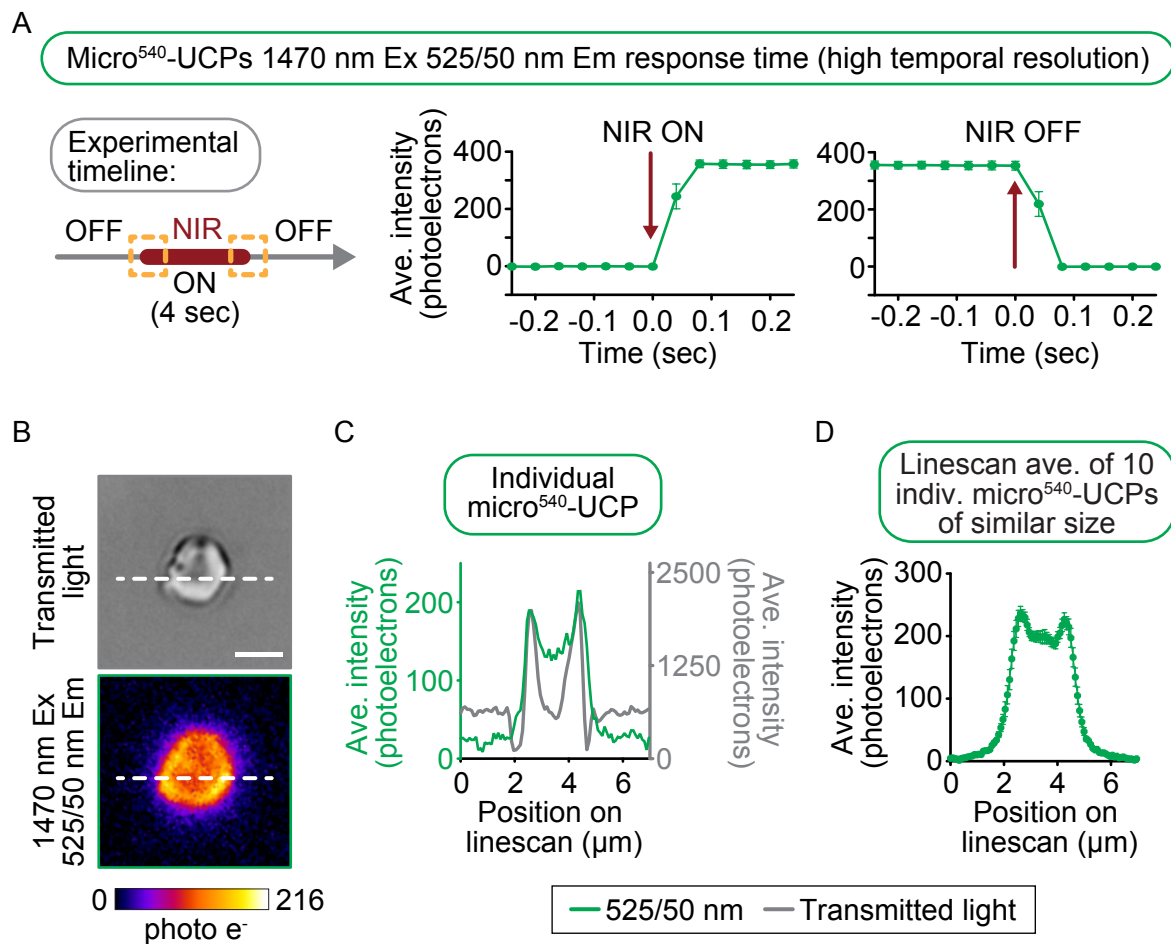

Figure S3. Sundaramoorthy et al. 2017

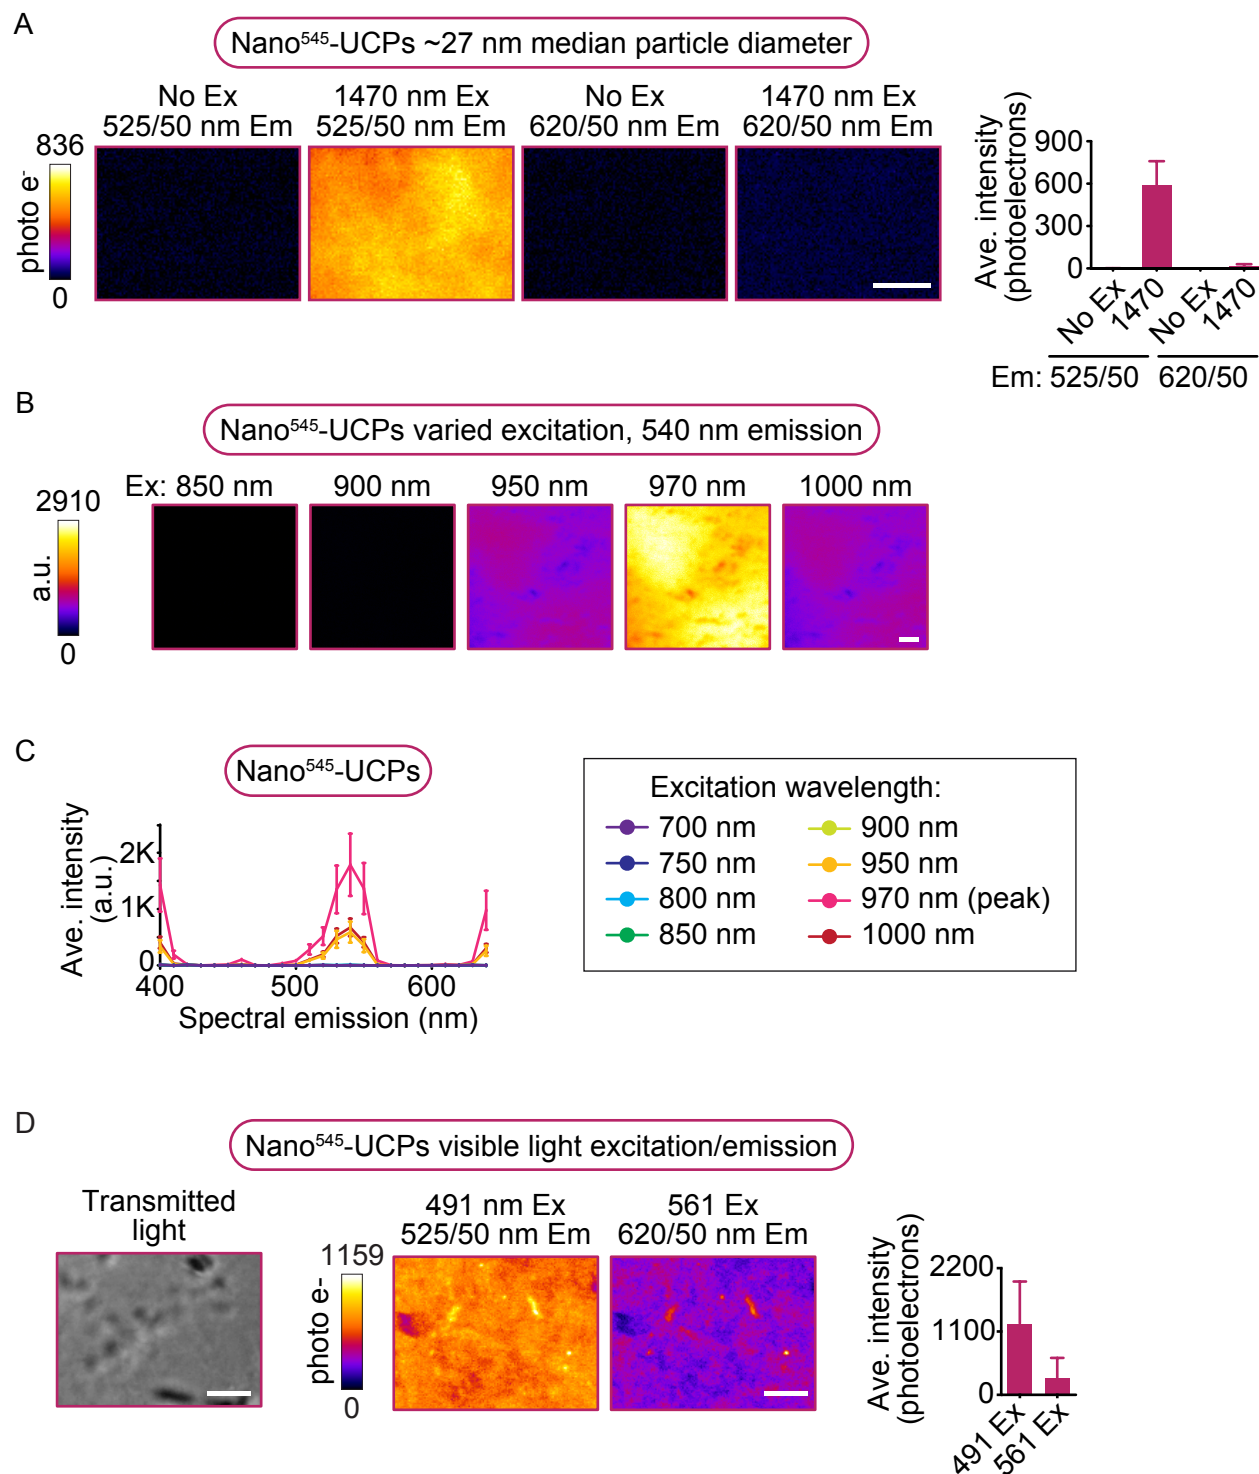

Figure S4. Sundaramoorthy et al. 2017

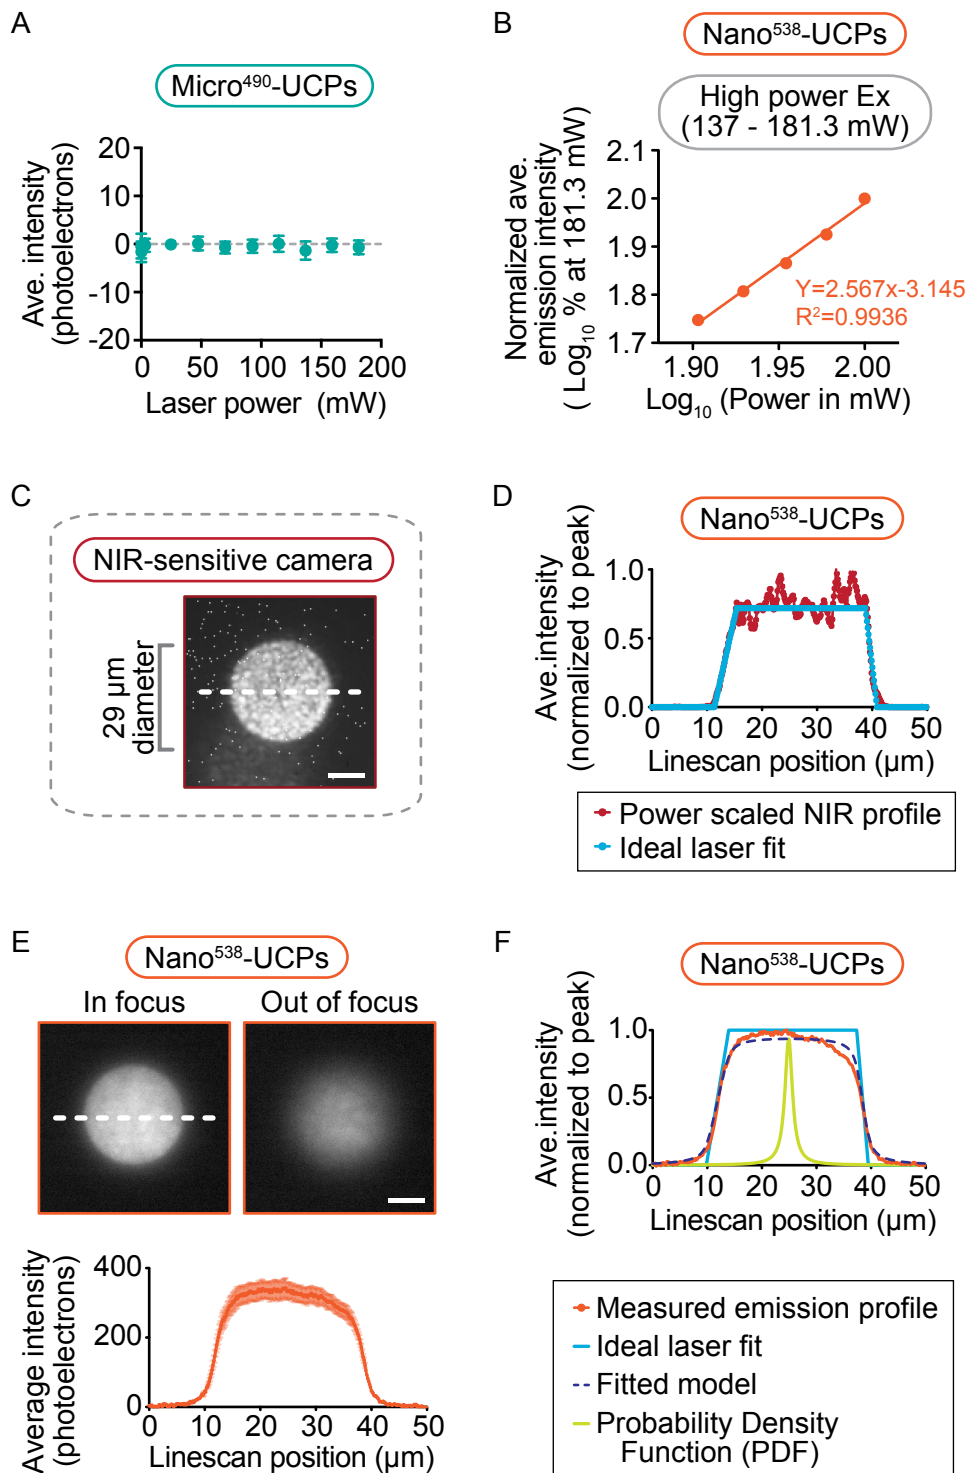

Figure S5. Sundaramoorthy et al. 2017

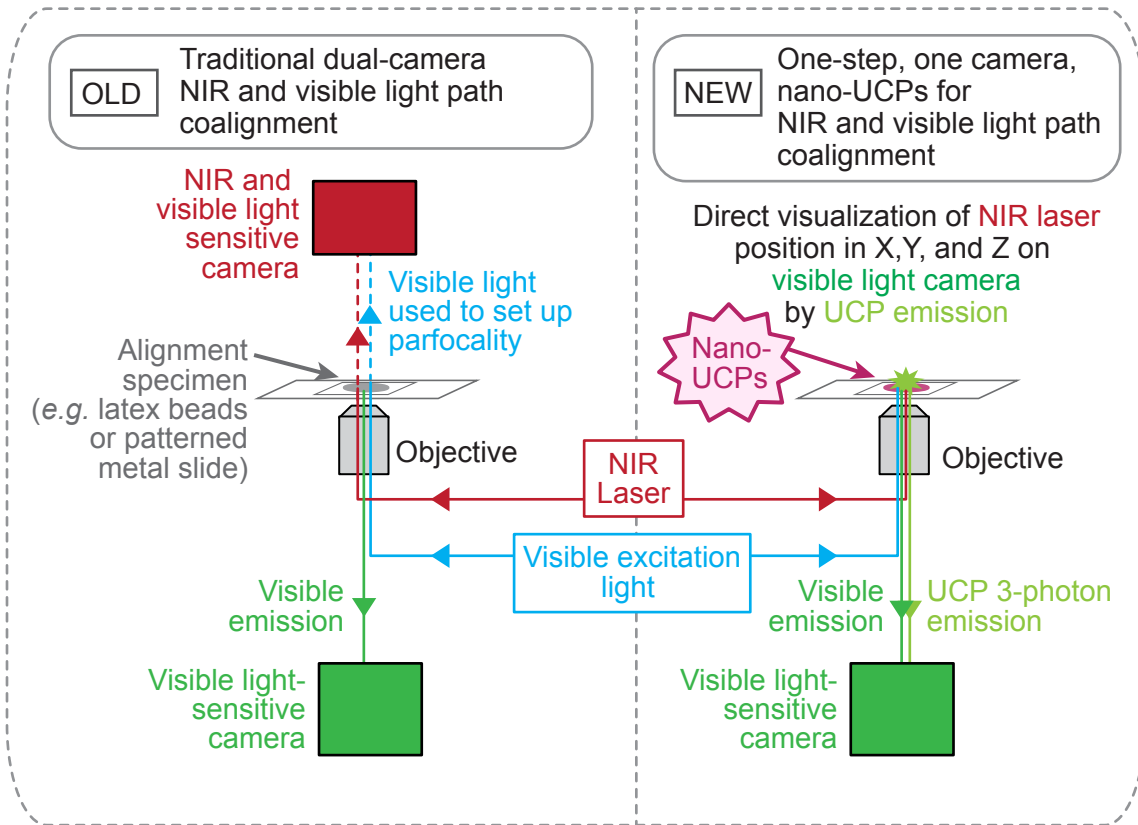

Supplement: NIHMS860929-supplement-Supp__Figures.pdf [file NIHMS860929-supplement-Supp__Figures.pdf]
